# Supplementary material for: α-Fe 2 O 3 /Ti 3 C 2 T x MXene Heterostructures as Photo-Fenton Catalysts Driving RAFT Polymerization for Ultrasensitive Electrochemical microRNA Sensing
Source: Research Square preprint supplement (doi:10.21203/rs.3.rs-7482836/v1), 2025-09-12
Supplement: Supplementary file 1 [file 9afd72ea176ac7c7aa265afb.docx]

**α-Fe2O3/Ti3C2Tx MXene Heterostructures as Photo-Fenton Catalysts Driving RAFT Polymerization for Ultrasensitive Electrochemical microRNA Sensing**

*Thao Thi Nguyen a,1**, Tian Zhidan b,1,*, Weibo Huang a,1, Qinyuan Xu a, Shuaibing Yu a, Gengzhi Sun**c,***, Jinming Konga, **

*a School of Environmental and Biological Engineering, Nanjing University of Science and Technology, Nanjing 210094, China*

*b Department of Pathology, Nanjing First Hospital, Nanjing Medical University, No. 68 Changle Road, Qinhuai District, Nanjing, Jiangsu, China*

*c Institute of Advanced Materials (IAM), Nanjing Technological University, 30 South Puzhu Road, Nanjing 211816, China*

1. *Those authors contributes equally*

* *Corresponding author E−mail addresses:*

[*tianzhidan@foxmail.com*](mailto:tianzhidan@foxmail.com)*，*

[*iamgzsun@njtech.edu.cn*](mailto:iamgzsun@njtech.edu.cn)*，*

*j. kong@njust.edu.cn (J. Kong)*

**Chemicals**

All chemical reagents are of analytical grade or higher. Ferrocenylmethyl methacrylate (FMMA) was purchased from Bide Pharmatech Ltd (Shanghai, China), 4-cyano-4-(thiobenzoyl) valeric acid (CPAD), (1-ethyl-3-(3-dimethyl aminopropyl) carbodiimide hydrochloride (EDC), and N-hydroxysuccinimide (NHS) were purchased from Sigma-Aldrich (St. Louis, MO, https://www.sigmaaldrich. com/china-mainland.html). Lithium perchlorate trihydrate (LiClO4) were supplied by J&K Scientific Co., Ltd (Shanghai, China). Normal human serum (NHS) was prepared from Solarbio Science & Technology Co., Ltd (Beijing, China). Hydrogen peroxide (H2O2) were commercially acquired from Sinopharm Chemical Reagent Co., Ltd (Shanghai, China). N,N-dimethylformamide (DMF), ethanol (EtOH), and other chemicals were ordered from commercial suppliers. The experimental water was all ultrapure water (≥18.25 MΩ. cm).

Synthesis of urchin-like α-Fe2O3 materials: iron(III) chloride hexahydrate (FeCl3·6H2O) was purchased from Meryer (Shanghai, China), sodium sulfate (Na2SO4) was purchased from Sinopharm Chemical Reagent Co., Ltd (Shanghai, China).

Synthesis of materials MXene: MAX Ti3AlC2 powder (400 mesh Jilin 11 Technology Co., Ltd), lithium fluoride (LiF, ≥ 99.9%, Shanghai Aladdin Bio-Chemical Technology Co., Ltd) and Hydrochloric acid (HCl, 36% to 38%, Yonghua Chemical Reagent Co., Ltd).

**Table S1** The sequences of Hairpin DNA, miRNA-21, SSM, TSM and NC. Name Sequences:

| polyA-DNA | 5′-AAAAAAAAAAAAAAAAAAAATTGCCCTCTCAA -3′ |
| --- | --- |
| miRNA-144 | 5′-AAA AGC UGG GUU GAG AGG GCA A-3′ |
| NH2-DNA | 5′-CCC AGC TTT TCA CAG ACT-NH2-3′ |
| SSM | 5′-UAG CUU AUC GGA CUG AUG UUG A -3′ |
| TSM | 5′-UUG CUU AUC GGA CUG AUC UUG A-3′ |
| NC | 5′-UUA AUG CUA AUC GUG AUA GGG GU-3′ |

**Instruments**

Cyclic voltammetry (CV) and square wave voltammetry (SWV, scan range: -0.2 V to 1.5 V; Amplitude: 0.025 V; Frequency: 15 Hz) were performed on CHI660E electrochemical workstation (Shanghai Chenhua Instrument Co. Ltd., China) with a conventional three-electrode cell setup, comprising a bare gold electrode (Au, Φ = 2.0 mm) as the working electrode, SCE as the reference electrode, and a platinum wire as the counter electrode, respectively. Electrochemical impedance spectroscopy (EIS, the open circuit potential was 0.18 V, the amplitude of the applied sine wave potential was 5.0 mV, and the frequency range was 100 KHz to 0.1 Hz) was performed on Autolab/PGSTAT302N (Eco Chemie, Netherlands). Scanning electron microscope (SEM) was performed on the Hitachi Regulus8100. X-ray photoelectron spectroscopy (XPS) analyses were performed on Thermo Fisher ESCALAB 250Xi (Al Kα X-ray source) spectrometer. UV–vis diffuse reflectance spectra were detected by LAMBDA 750 UV/Vis/NIR spectrophotometer from PerkinElmer.

**Structural and Morphological Characterization of α-Fe2O3/Ti3C2Tx MXene Catalysts**

X-ray photoelectron spectroscopy (XPS) was conducted to investigate the surface chemical states and interfacial interactions within the α-Fe2O3/Ti3C2Tx MXene composite. As depicted in **Fig. S1 B,** the survey XPS spectrum confirmed the presence of Fe, C, O, Ti, and F elements, consistent with the compositional distribution observed in the elemental mapping analysis (**Fig 2**) [1,2].

High-resolution XPS analysis of the Fe 2p region (**Fig. S1 C**) revealed two prominent peaks at 711.5 eV and 724.6 eV, corresponding to Fe 2p3/2 and Fe 2p1/2 spin–orbit components, respectively, along with satellite peaks at 716.7 eV and 731.4 eV [3]. These features are characteristic of Fe3+ oxidation states, confirming the presence of α-Fe2O3. Compared with pristine α-Fe2O3, the Fe2p peak intensities in the α-Fe2O3/Ti3C2Tx MXene sample were reduced, likely due to partial coverage of α-Fe2O3 by the Ti3C2Tx MXene nanosheets, which attenuated the signal. Complementary analysis of the C 1s spectrum (**Fig. S1 D**) was deconvoluted into four peaks centered at 282.0 eV (C-Ti), 285.4 eV (C-C), 287.8 eV (C-O), and 291.8 eV (C=O), indicating the presence of diverse carbon environments[4]. The diminished intensity of the C-Ti peak suggests a possible transformation of C-Ti to C-Ti-O bonds due to oxygen incorporation during composite formation. This interfacial interaction was further substantiated by the Ti 2p spectrum (**Fig. S1 E**), which exhibited a noticeable decrease in the Ti-C peak intensity at 455.9 eV. Additional peaks corresponding to Ti2+ (461.9 eV), Ti3+ (458.9 eV), and Ti4+ (464.6 eV) were observed, and their slight shift toward higher binding energies indicates a redistribution of electron density around Ti atoms [1,4-5]. This shift is attributed to interfacial electron transfer from Ti3C2Tx to α-Fe2O3, reflecting the formation of a strong electronic interaction at the heterojunction interface. The O 1s spectrum (**Fig. S1 F**) was fitted with three components at 529.8 eV (Fe-O), 531.3 eV (Ti-O-Ti), and 532.4 eV (C-O) [4], further confirming the coexistence of metal oxides and surface functional groups.


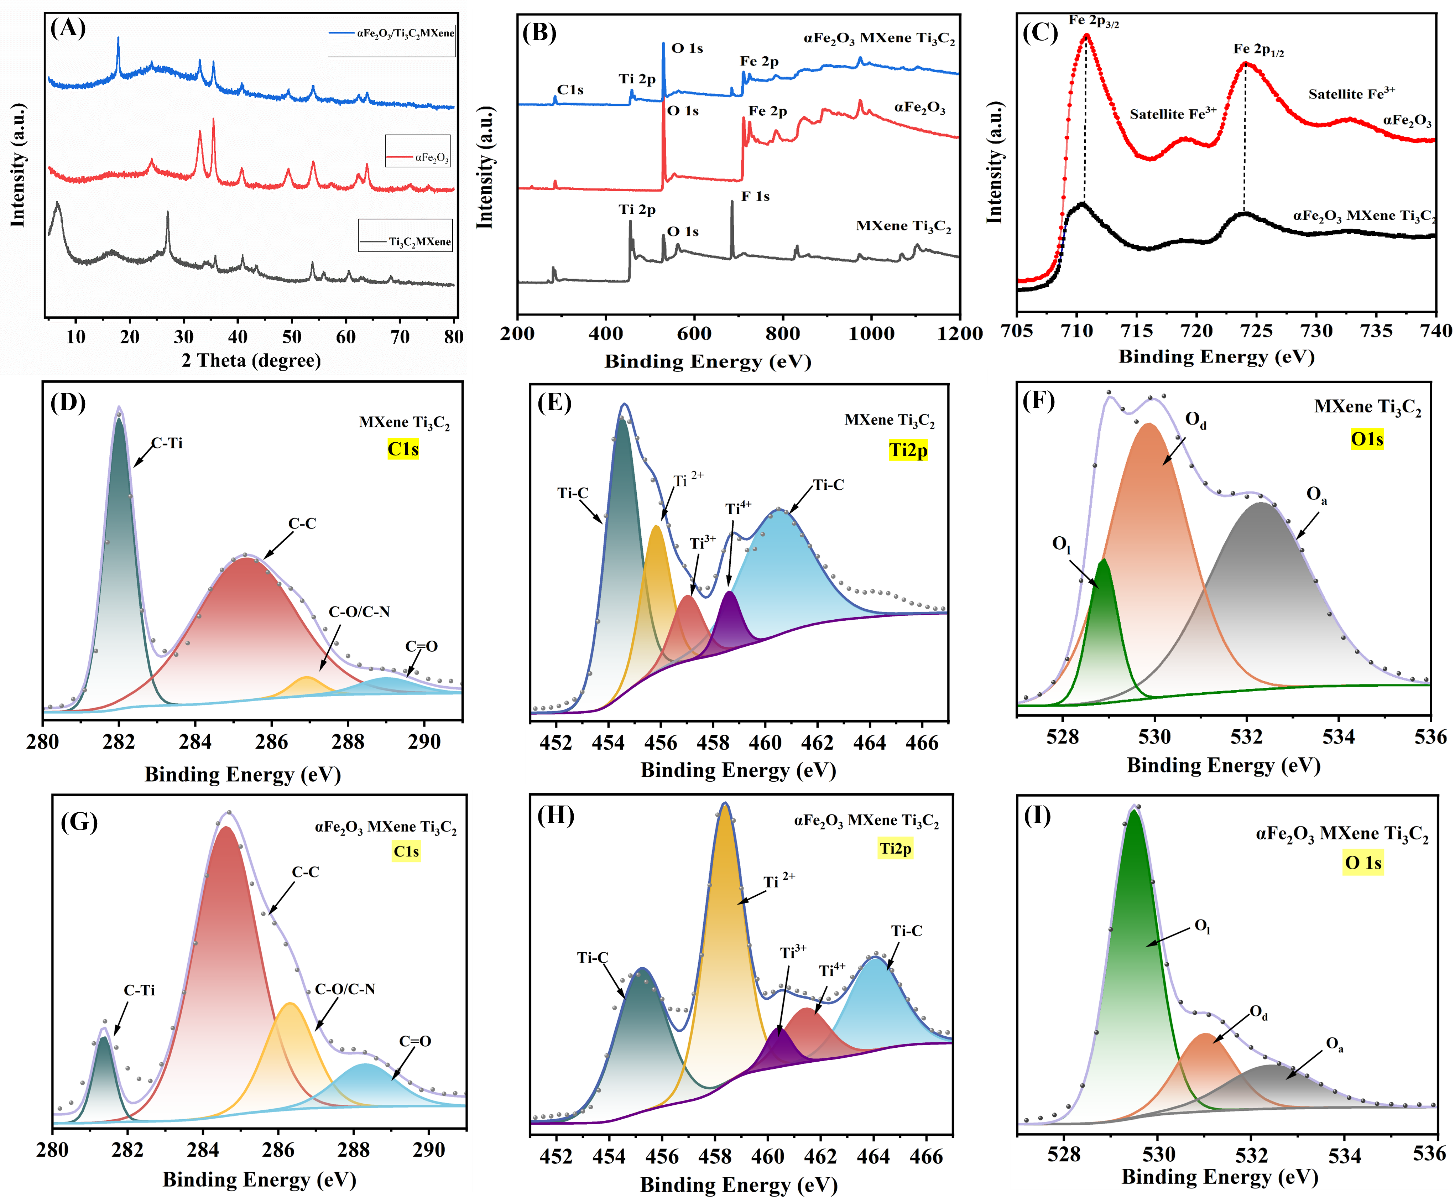


**Fig. S1** (A) XRD patterns of Ti3C2TxMXene, α-Fe2O3 and α-Fe2O3/ Ti3C2TxMXene composites. (B) XPS survey spectrum and (C-I) high-resolution spectra of Ti3C2TxMXene, α-Fe2O3 and α-Fe2O3/ Ti3C2TxMXene composites.

**Electrochemical Characterization**

Additionally, as presented in **Fig. S2**, SEM analysis of the electrode surface after PET-RAFT polymerization revealed a uniform and densely packed polymer layer exhibiting a thin, chain-like morphology. This observation confirms the successful and efficient progression of each surface modification step described in Fig. 1B, thereby validating the effectiveness of the surface-initiated PET-RAFT polymerization protocol.





**Fig. S2 SEM image of the polymerized gold electrode**


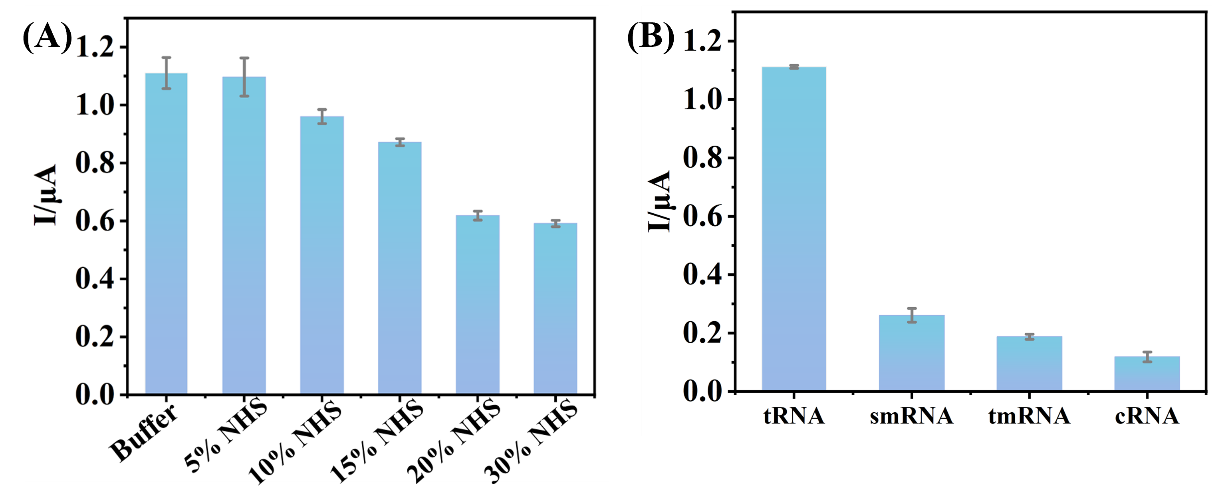


**Fig. S3** (A)Influence of biosensor hybridization with different RNAs (10 pM). (B) Current signals in different proportions of normal human serum (thrombin: 1.0 ng/mL).

**Table S2** SWV signal intensity of standard tRNA sample in PBS buffer and tRNA in human serum sample at different concentrations

| Concentration | Current intensity (I/µA) with standard tRNA sample in PBS bufer | | Current intensity (I/µA) with tRNA in human serum sample | Recovery % |
| --- | --- | --- | --- | --- |
| 10 pM | | 1.145 | 1.125 | 98.2% |
| 0.1pM | | 0.848 | 0.799 | 93.1% |
| 0.1 fM | | 0.581 | 0.556 | 96.4% |

**References**

[1] TianZhu S, YuLong F, Tao P, and BaoGuo Y (2021) Sea urchin-shaped Fe2O3 coupled with 2D MXene nanosheets as negative electrode for high-performance asymmetric supercapacitors. Electrochimica Acta 318: 138245. https://doi.org/10.1016/j.electacta.2021.138245

[2] Yupeng G, Libo W, Aiguo Z, Zhengyang L, Jingkuo C, Hari B, Qianku H, and Xinxin C (2015) Hydrothermal synthesis of TiO2/Ti3C2 nanocomposites with enhanced photocatalytic activity. Materials Letters 150: 62-64. https://doi.org/10.1016/j.matlet.2015.02.135

[3] Yong J, Jia N, and Fang F (2021) Thermal decomposition of ferrous oxalate nanowires to porous nanowire-like α-Fe2O3 with a good gas-sensing properties. Mater. Sci. Semicond. Process 125: 105650. https://doi.org/10.1016/j.mssp.2020.105650

[4] Baihe S, He L, Zhuo L, Jue W, Xue B, Yang Z, Junkun C, Kan K, and Keying S (2021) Co3O4@PEI/Ti3C2Tx MXene nanocomposites for a highly sensitive NOx gas sensor with a low detection limit. J. Mater. Chem. A 9: 6335-6344. https://doi.org/10.1039/D0TA11392A

[5] Runxuan L, Zongxue Y, Qiuyue T, Xiaofang F, Ximei Z, Xuyang L, and Pingquan W(2021) Ti3C2 MXene/NH2-MIL-88B(Fe): research on the adsorption kinetics and photocatalytic performance of an efficient integrated photocatalytic adsorbent. Applied Surface Science 570: 151244. https://doi.org/10.1016/j.apsusc.2021.151244
